# Supplementary material for: Stemness of the hybrid Epithelial/Mesenchymal State in Breast Cancer and Its Association with Poor Survival
Source: PubMed Central journal article supplement (PMC4447403; doi:10.1371/journal.pone.0126522), 2015-05-28

# S2 Figure

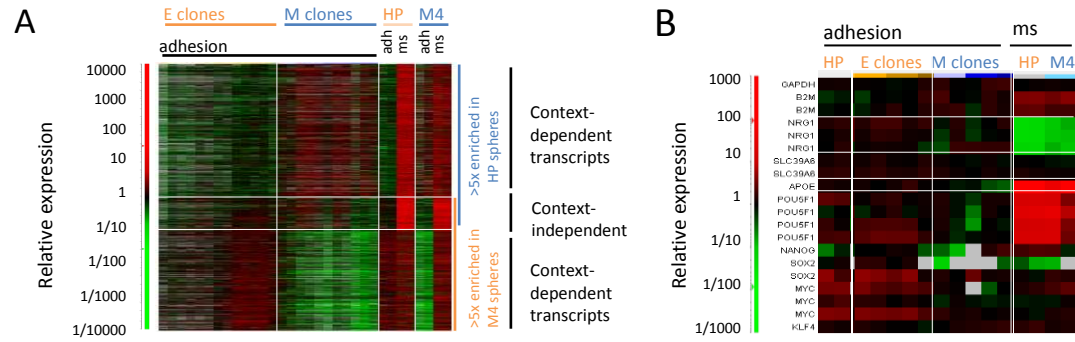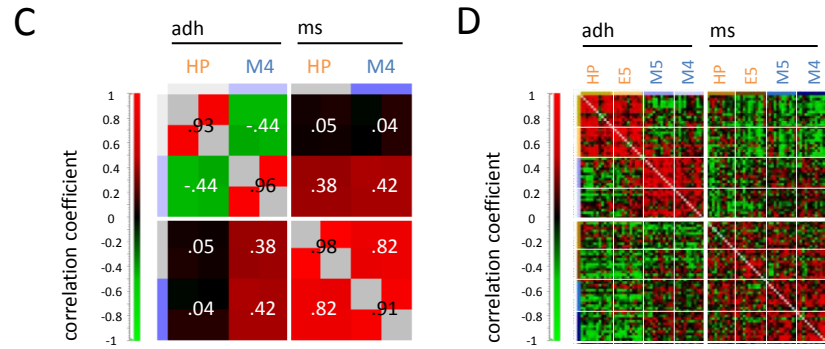

Supplement: pone.0126522.s003.pdf [file pone.0126522.s003.pdf]
