# Supplementary material for: Stemness of the hybrid Epithelial/Mesenchymal State in Breast Cancer and Its Association with Poor Survival
Source: PubMed Central journal article supplement (PMC4447403; doi:10.1371/journal.pone.0126522), 2015-05-28
Supplement: pone.0126522.s010.pdf [file pone.0126522.s010.pdf]

Table S3 - Gene Set enrichment analysis (related to Figure 1E)

|                                         |               | SIZE | ES         | NES        | NOM p-val | FDR q-val | FWER p-val | RANK AT | LEADING EDGE                    |
|-----------------------------------------|---------------|------|------------|------------|-----------|-----------|------------|---------|---------------------------------|
|                                         |               |      |            |            |           |           |            | MAX     |                                 |
| HP mammo-<br>spheres versus<br>adhesion | E_HMLER (150) | 142  | -0.3682842 | -5.131866  | < 0.0001  | < 0.0001  | < 0.01     | 1554    | tags=47%, list=11%, signal=52%  |
|                                         | M_HMLER (150) | 133  | 0.6444159  | 8.585951   | < 0.0001  | < 0.0001  | < 0.01     | 2296    | tags=80%, list=16%, signal=94%  |
|                                         | E_HMLE (128)  | 141  | -0.2024301 | -2.8126867 | < 0.0001  | < 0.0001  | < 0.01     | 1310    | tags=29%, list=9%, signal=32%   |
|                                         | M_HMLE (59)   | 77   | 0.4747764  | 4.7592473  | < 0.0001  | < 0.0001  | < 0.01     | 2001    | tags=61%, list=14%, signal=70%  |
| M4 mammo-<br>spheres versus<br>adhesion | E_HMLER (150) | 121  | 0.8161899  | 10.590222  | < 0.0001  | < 0.0001  | < 0.01     | 1277    | tags=90%, list=9%, signal=98%   |
|                                         | M_HMLER (150) | 135  | -0.4788928 | -6.334316  | < 0.0001  | < 0.0001  | < 0.01     | 1237    | tags=56%, list=9%, signal=61%   |
|                                         | E_HMLE (128)  | 122  | 0.6277533  | 7.952708   | < 0.0001  | < 0.0001  | < 0.01     | 2978    | tags=84%, list=21%, signal=105% |
|                                         | M_HMLE (59)   | 77   | -0.440355  | -4.5861273 | < 0.0001  | < 0.0001  | < 0.01     | 2404    | tags=61%, list=17%, signal=73%  |
