# Supplementary material for: Stemness of the hybrid Epithelial/Mesenchymal State in Breast Cancer and Its Association with Poor Survival
Source: PLoS One. 2015 May 28;10(5):e0126522. doi: 10.1371/journal.pone.0126522 (PMC4447403; doi:10.1371/journal.pone.0126522)
Supplement: S4 Table — List of the Taqman assays used for single cell and 100 cell qPCR analyses shown in Figs 3 and 5 are indicated and their order numbers (Life Technologies) are shown. (XLSX) [file pone.0126522.s011.xlsx]

## Sheet: SI table 4 Taqman primers list
S4 Table: Taqman primer list (related to Figures 3D-F and 5B)
	Fig. 3	Fig. 5	E - M state space	gene	Taqman gene expression assay #4331182 (FAM-MGB, Life Technologies)	gene group by array and qPCR
1	x	x		ABCA6	Hs00365329_m1	epithelial-specific genes
2		x		AR	Hs00171172_m1	mesenchymal-specific genes
3	x	x		B2M	Hs99999907_m1	housekeeping genes
4	x	x		CD24	Hs00273561_s1	pluripotency genes
5	x	x		CD44	Hs01075861_m1
6	x	x		CDH1	Hs01023895_m1
7	x	x		CDH2	Hs00983062_m1
8	x			CDKN1B	Hs00153277_m1
9	x	x		CHI3L1	Hs00609691_m1
10	x	x		CLDN7	Hs00154575_m1
11	x	x		CRYAB	Hs00157107_m1
12	x			CTNNB1	Hs00355049_m1
13	x			CXCL1	Hs00605382_gH
14	x	x		DCN	Hs00754870_s1
15	x	x		EPCAM	Hs00901885_m1
16	x	x		ERBB2	Hs01001580_m1
17	x	x		ESR	Hs00174860_m1
18	x	x		FN1	Hs01549958_m1
19	x	x		FOXO1	Hs01054576_m1
20	x	x		GAPDH	Hs99999905_m1
21	x	x		ID2	Hs00747379_m1
22	x	x		IL1B	Hs01555410_m1
23	x	x		IL1R1	Hs00991010_m1
24	x	x		KRT5	Hs00361185_m1
25	x	x		LCN2	Hs01008571_m1
26	x	x		MGP	Hs00179899_m1
27	x	x		MMP7	Hs01042796_m1
28	x			MYC	Hs00905030_m1
29	x	x		NANOG	Hs02387400_g1
30	x	x		NRG1	Hs00247620_m1
31		x		OPG	Hs00900358_m1
32	x	x		PCOLCE	Hs00170179_m1
33	x	x		POU5F1 634	Hs00999634_gH
34	x	x		POU5F1 807	Hs01654807_s1
35	x	x		POU5F1 111	Hs03005111_g1
36	x	x		S100A8	Hs00374264_g1
37	x	x		S100P	Hs00195584_m1
38	x	x		SLPI	Hs00268204_m1
39	x	x		SNAI1	Hs00195591_m1
40		x		SNAI2	Hs00950344_m1
41	x	x		SOX2	Hs01053049_s1
42	x	x		SULF1	Hs00290918_m1
43	x	x		TP63	Hs00978343_m1
44		x		TR10A	Hs00269492_m1
45		x		TR10B	Hs00366278_m1
46		x		TR10C	Hs00182570_m1
47		x		TR10D	Hs00174664_m1
48	x	x		TRAIL	Hs00921974_m1
49	x	x		VIM	Hs00958116_m1
50	x	x		WNT5A	Hs00998537_m1
51		x		ZEB1	Hs00232783_m1
52	x	x		ZEB2	Hs00207691_m1
